# Supplementary material
Source: PubMed Central journal article supplement (PMC11216949)
Supplement: NIHMS2002151-supplement-SI.pdf [file NIHMS2002151-supplement-SI.pdf]

# Supporting Information

## Development of nanobody-displayed whole-cell biosensors for the colorimetric detection of SARS-CoV-2

Yawen He<sup>1</sup>, Zhiyuan Xu<sup>1</sup>, Tom Kasputis<sup>1</sup>, Xue Zhao<sup>1</sup>, Itati Ibañez<sup>3</sup>, Florencia Pavan<sup>3</sup>, Marina Bok<sup>4</sup>,  
Juan Pablo Malito<sup>4</sup>, Viviana Parreno<sup>2,4</sup>, Lijuan Yuan<sup>2</sup>, R. Clay Wright<sup>1</sup>, Juhong Chen<sup>1,\*</sup>

<sup>1</sup> Department of Biological Systems Engineering, Virginia Tech, Blacksburg, VA 24061, USA

<sup>2</sup> Department of Biomedical Sciences and Pathobiology, Virginia-Maryland College of Veterinary Medicine, Virginia Tech, Blacksburg, VA 24061, USA

<sup>3</sup> CONICET Universidad de Buenos Aires, Instituto de Química Física de los Materiales, Medio Ambiente y Energía (INQUIMAE).

<sup>4</sup> Incuinta, Instituto Nacional de Tecnología Agropecuaria (INTA), Instituto de Virología e Innovaciones Tecnológicas, INTA-Consejo Nacional de Investigaciones Científicas y Técnicas (IVIT, INTA-CONICET), Castelar, 1712, Buenos Aires, Argentina

\* Corresponding author:

Juhong Chen, Ph.D.

Assistant Professor

Department of Biological Systems Engineering

Virginia Tech, VA 24061, USA

Tel: 540-231-1689; Fax: 540-231-3199

Email: [jhchen@vt.edu](mailto:jhchen@vt.edu)

**Table S1.** Information of nanobodies<sup>1</sup>

| Nanobody | Specificity   | Virus neutralization |
|----------|---------------|----------------------|
| Nb-33    | Spike protein | No                   |
| Nb-45    | Spike protein | Yes*                 |
| Nb-46    | Spike protein | No                   |

\*Nb-45 has a low virus neutralization rate and does not interfere with the binding between nanobody and virus.

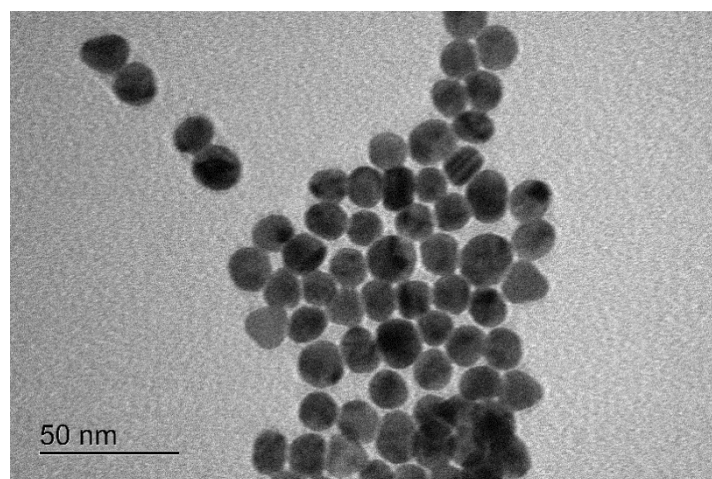

**Figure S1.** TEM image of AuNPs

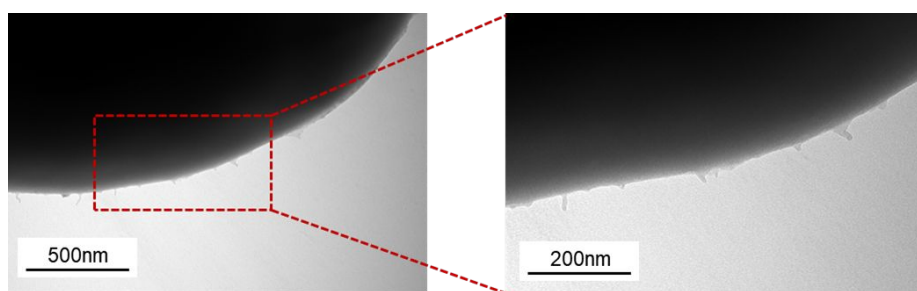

**Figure S2.** TEM image of nanobody-displayed yeast

**Reference:**

1. Pavan, MF; Bok, M; Malito, JP; Marcoppido, GA; Franco, DR; Schammas, JM; Baumeister, E; Auguste, J; Stone, WB; Yuan, L; Wigdorovitz, A; Parreño, V; Ibañez, LI. Llama-Derived Nanobodies Binding the Spike Protein of Novel Coronavirus Sars-Cov-2 With Neutralizing Activity. PCT Application No. PCT/US21/64662. P4952PC00. INTA-CONICET-Virgina Tech. December, 21<sup>st</sup>, 2021.
